# Supplementary material for: Ecological Requirements for Abundance and Dispersion of Brazilian Yellow Fever Vectors in Tropical Areas
Source: MDPI journal article supplement (doi:10.3390/ijerph21050609), 2024-05-10
Supplement: s1 [file s1]

## Supplementary material

**Table S1.** Concurrent models to analyze how particular landscape metrics influence the abundances of *Haemagogus leucocelaenus* and *Haemagogus janthinomys* at different scales (500 m, 1.0 km, 1.5 km, 2.0 km, and 2.5 km).

| Species                                                         | Predictor variables                                        | Scales                                   |
|-----------------------------------------------------------------|------------------------------------------------------------|------------------------------------------|
| <i>Haemagogus leucocelaenus</i> / <i>Haemagogus janthinomys</i> | null 1 = abundance ~1                                      | -                                        |
| <i>Haemagogus leucocelaenus</i> / <i>Haemagogus janthinomys</i> | null 2 = abundance ~ latitude                              | -                                        |
| <i>Haemagogus leucocelaenus</i> / <i>Haemagogus janthinomys</i> | null 3 = abundance ~ longitude                             | -                                        |
| <i>Haemagogus leucocelaenus</i> / <i>Haemagogus janthinomys</i> | null 2 = abundance ~ latitude + longitude                  | -                                        |
| <i>Haemagogus leucocelaenus</i> / <i>Haemagogus janthinomys</i> | Percentage of forest cover (1)                             | 500 m, 1.0 km, 1.5 km, 2.0 km and 2.5 km |
| <i>Haemagogus leucocelaenus</i> / <i>Haemagogus janthinomys</i> | Percentage of native vegetation (2)                        | 500 m, 1.0 km, 1.5 km, 2.0 km and 2.5 km |
| <i>Haemagogus leucocelaenus</i> / <i>Haemagogus janthinomys</i> | Percentage of agricultural land (3)                        | 500 m, 1.0 km, 1.5 km, 2.0 km and 2.5 km |
| <i>Haemagogus leucocelaenus</i> / <i>Haemagogus janthinomys</i> | Number of forest fragments (4)                             | 500 m, 1.0 km, 1.5 km, 2.0 km and 2.5 km |
| <i>Haemagogus leucocelaenus</i> / <i>Haemagogus janthinomys</i> | Forest edge density (5)                                    | 500 m, 1.0 km, 1.5 km, 2.0 km and 2.5 km |
| <i>Haemagogus leucocelaenus</i> / <i>Haemagogus janthinomys</i> | Number of native vegetation fragments (6)                  | 500 m, 1.0 km, 1.5 km, 2.0 km and 2.5 km |
| <i>Haemagogus leucocelaenus</i> / <i>Haemagogus janthinomys</i> | Native vegetation edge density (7)                         | 500 m, 1.0 km, 1.5 km, 2.0 km and 2.5 km |
| <i>Haemagogus leucocelaenus</i> / <i>Haemagogus janthinomys</i> | (4) + Cohesion index among forest fragments (8)            | 500 m, 1.0 km, 1.5 km, 2.0 km and 2.5 km |
| <i>Haemagogus leucocelaenus</i> / <i>Haemagogus janthinomys</i> | (6) + Cohesion index among native vegetation fragments (9) | 500 m, 1.0 km, 1.5 km, 2.0 km and 2.5 km |
| <i>Haemagogus leucocelaenus</i> / <i>Haemagogus janthinomys</i> | (1) + (4)                                                  | 500 m, 1.0 km, 1.5 km, 2.0 km and 2.5 km |
| <i>Haemagogus leucocelaenus</i> / <i>Haemagogus janthinomys</i> | (5) + (3)                                                  | 500 m, 1.0 km, 1.5 km, 2.0 km and 2.5 km |
| <i>Haemagogus leucocelaenus</i> / <i>Haemagogus janthinomys</i> | (4) + (3)                                                  | 500 m, 1.0 km, 1.5 km, 2.0 km and 2.5 km |
| <i>Haemagogus leucocelaenus</i> / <i>Haemagogus janthinomys</i> | (4) + (8) + (3)                                            | 500 m, 1.0 km, 1.5 km, 2.0 km and 2.5 km |
| <i>Haemagogus leucocelaenus</i> / <i>Haemagogus janthinomys</i> | (2) + (3)                                                  | 500 m, 1.0 km, 1.5 km, 2.0 km and 2.5 km |
| <i>Haemagogus leucocelaenus</i> / <i>Haemagogus janthinomys</i> | (2) + (7)                                                  | 500 m, 1.0 km, 1.5 km, 2.0 km and 2.5 km |
| <i>Haemagogus leucocelaenus</i> / <i>Haemagogus janthinomys</i> | (2) + (6)                                                  | 500 m, 1.0 km, 1.5 km, 2.0 km and 2.5 km |
| <i>Haemagogus leucocelaenus</i> / <i>Haemagogus janthinomys</i> | (7) + (3)                                                  | 500 m, 1.0 km, 1.5 km, 2.0 km and 2.5 km |
| <i>Haemagogus leucocelaenus</i> / <i>Haemagogus janthinomys</i> | (6) + (3)                                                  | 500 m, 1.0 km, 1.5 km, 2.0 km and 2.5 km |
| <i>Haemagogus leucocelaenus</i> / <i>Haemagogus janthinomys</i> | (6) + (9) + (3)                                            | 500 m, 1.0 km, 1.5 km, 2.0 km and 2.5 km |
